# Supplementary material for: Laboratory tests for investigating anemia: From an expert system to artificial intelligence
Source: PubMed Central journal article supplement — Pract Lab Med. 2024 Feb 10;39:e00357. doi: 10.1016/j.plabm.2024.e00357 (PMC10883828; doi:10.1016/j.plabm.2024.e00357), 2024-02-10
Supplement: mmc1.pdf [file mmc1.pdf]

# Suppl . Figure 1

Hemoglobin < 12 or 13 g/dl (F/M) and MCV < 80 fl

## Microcytic anemia

- Blood smear
- Ferritin
- Transferrin
- Vit B12
- Folates
- Genetic analyses (?)

### Not prescribed by ChatGPT

- TSAT
- CRP
- Hemoglobin electrophoresis

### Prescribed by ChatGPT although not necessary

- Vit B12
- Folates
- Genetic analyses

## Normocytic anemia

- Ferritin
- Vit B12
- Folates
- Bilirubin, liver enzymes
- Creatininemia
- Test for blood in stool
- Genetic analyses (?)
- Blood smear

### Not prescribed by ChatGPT

- Reticulocytes
- Haptoglobin
- TSAT
- CRP, fibrinogen
- PT

### Prescribed by ChatGPT although not necessary

- Vit B12
- Folates
- Genetic analyses

## Macrocytic anemia

- Ferritin
- Vit B12
- Folates
- Genetic analyses (?)
- Blood smear

### Not prescribed by ChatGPT

- Reticulocytes count
- Haptoglobin
- TSH
- PT, AST, ALT, GGT

### Prescribed by ChatGPT although not necessary

- Ferritin
- Genetic analyses
